# Supplementary material for: Discovering and deciphering relationships across disparate data modalities
Source: eLife journal article supplement (doi:10.7554/elife.41690), 2019-01-15

# Simulated Example for 20 Dependencies

1. Linear

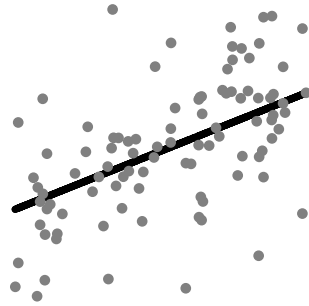

2. Exponential

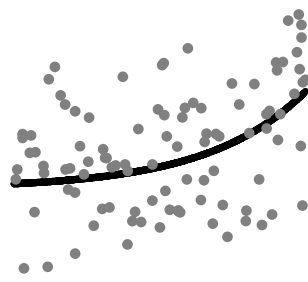

3. Cubic

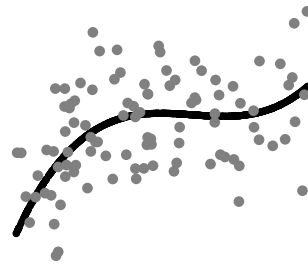

4. Joint Normal

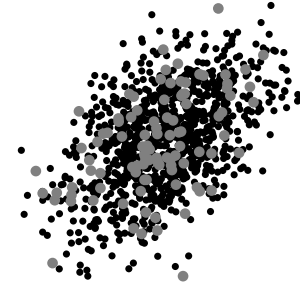

5. Step Function

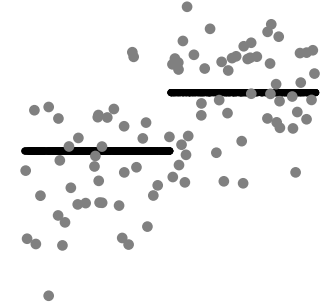

6. Quadratic

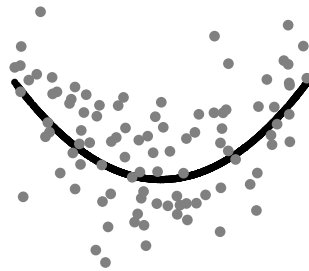

7. W Shape

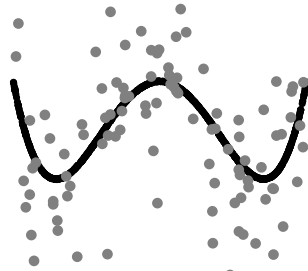

8. Spiral

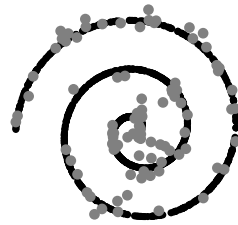

9. Bernoulli

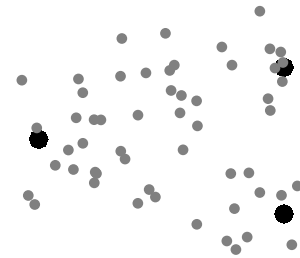

10. Logarithmic

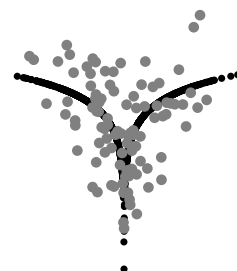

11. Fourth Root

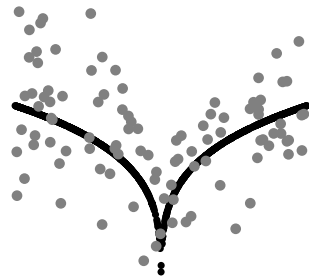

12. Sine Period  $4\pi$

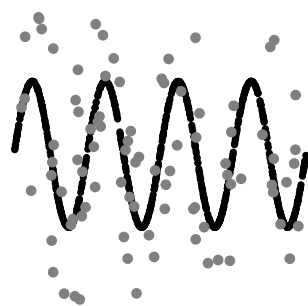

13. Sine Period  $16\pi$

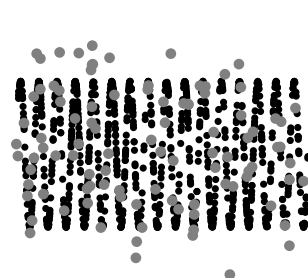

14. Square

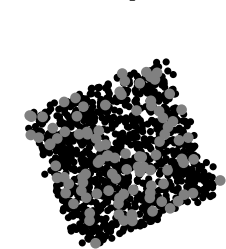

15. Two Parabolas

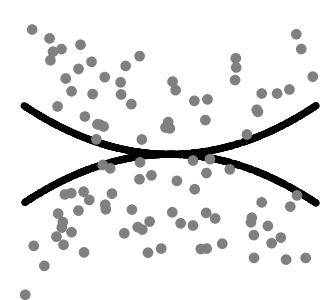

16. Circle

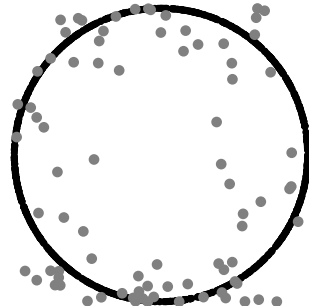

17. Ellipse

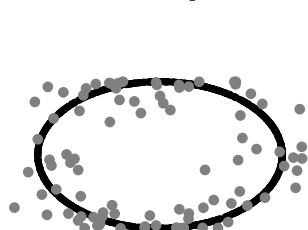

18. Diamond

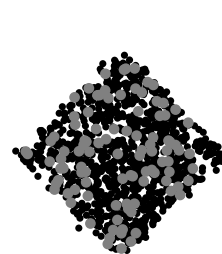

19. Multiplicative

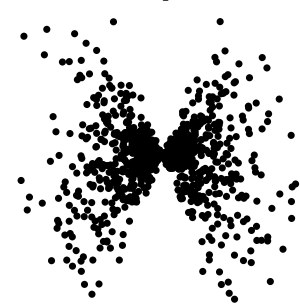

20. Independence

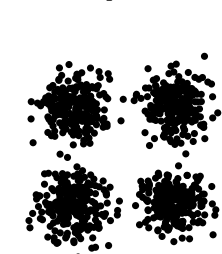

Supplement: supp [file elife-41690-supp-v1.zip]
