# Supplementary figures and images for: Discovering and deciphering relationships across disparate data modalities
Source: eLife journal article supplement (doi:10.7554/elife.41690), 2019-01-15

# MGC Image

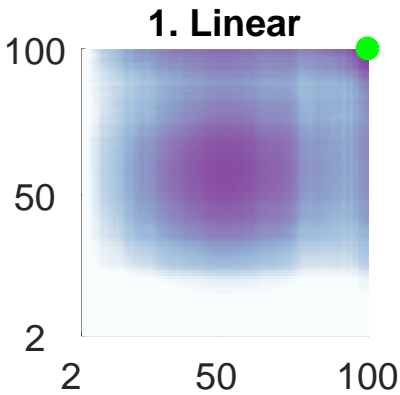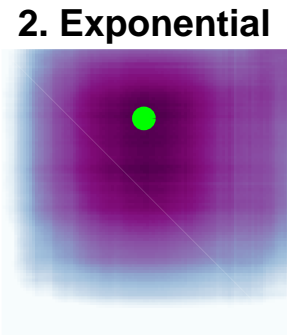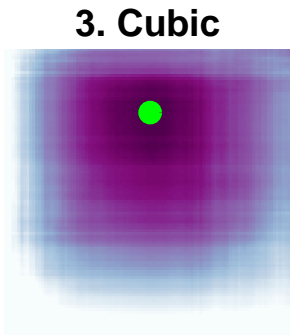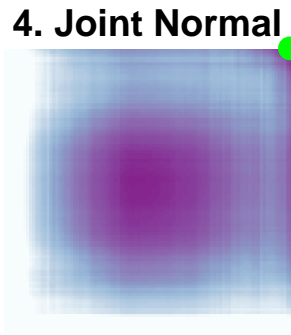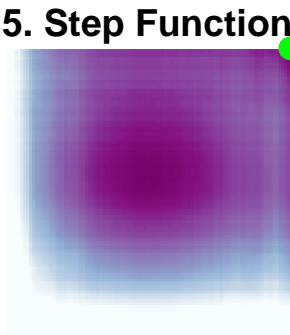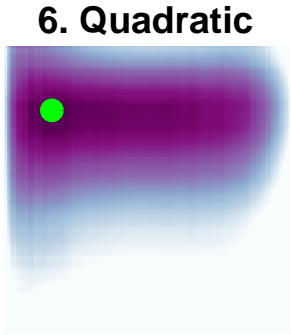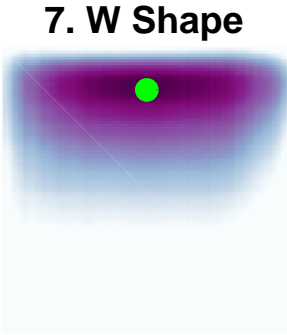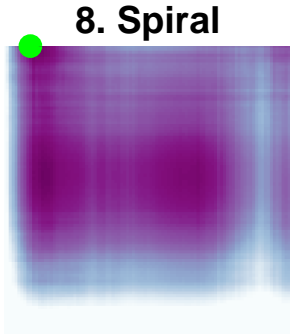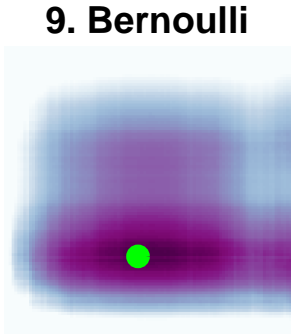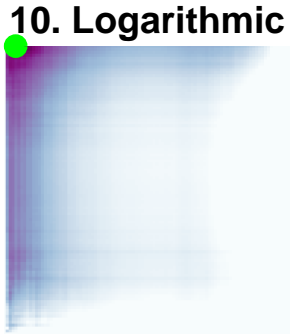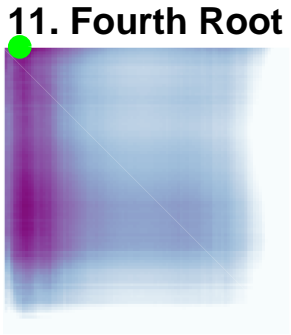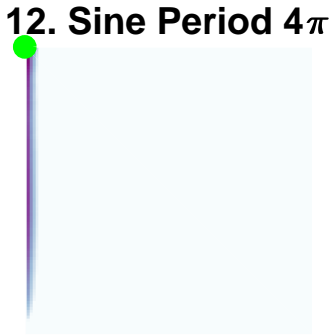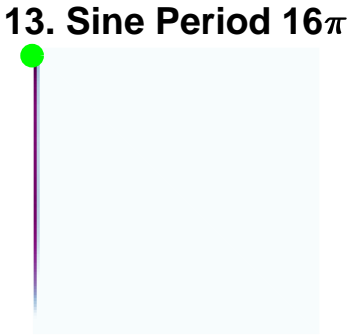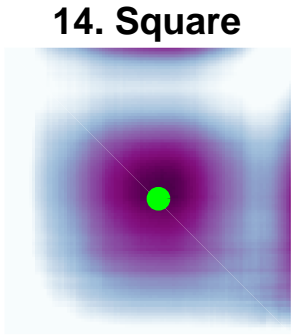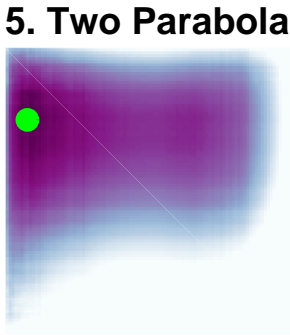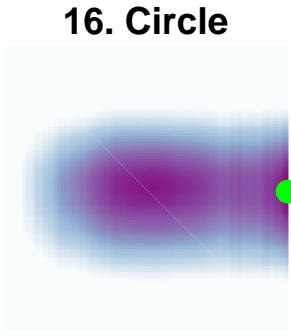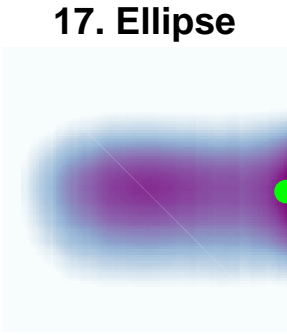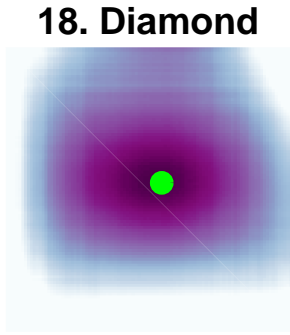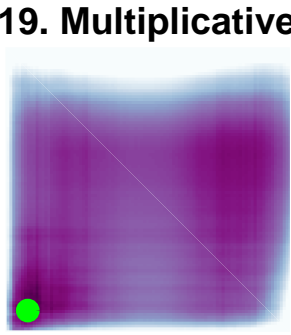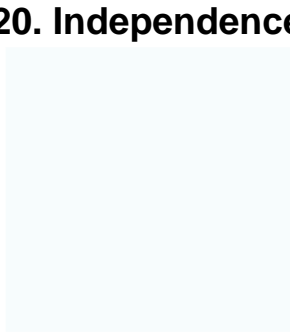

Supplement: supp [file elife-41690-supp-v1.zip]

Mcorr - MGC (Mcorr)  
Mantel - MGC(Mantel)

# Testing Power Difference for 1D Settings

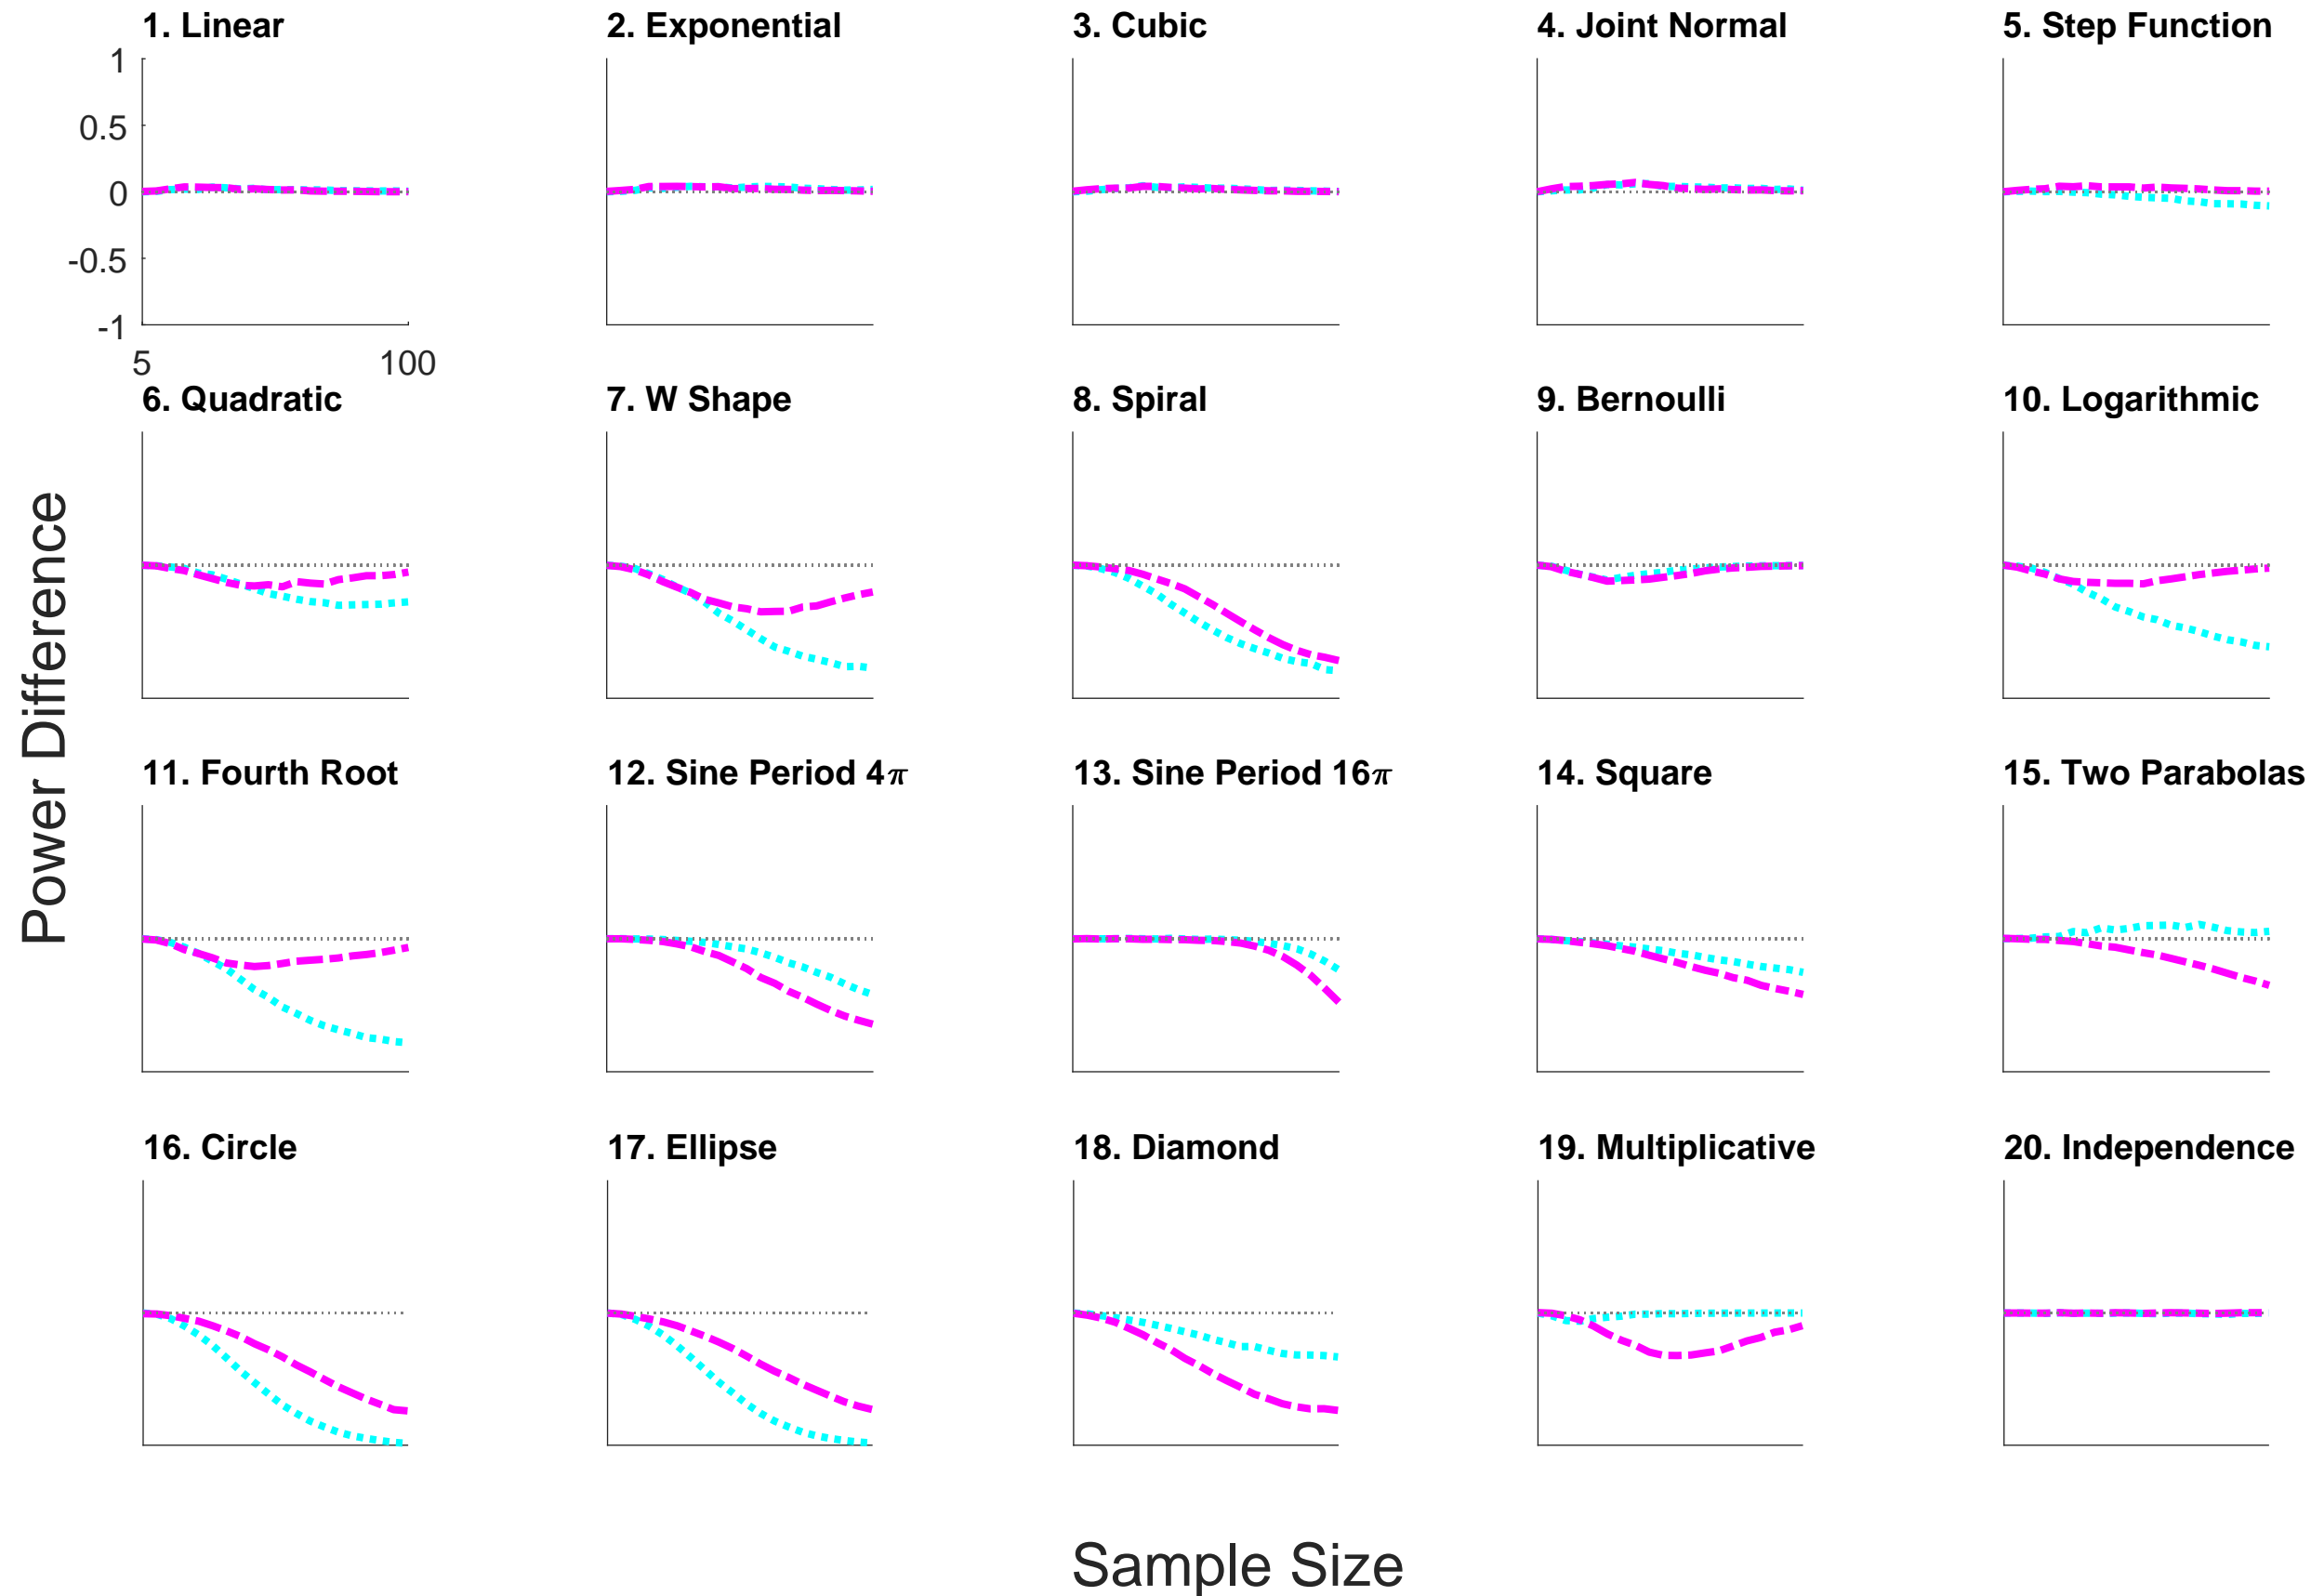

Supplement: supp [file elife-41690-supp-v1.zip]

Mcorr - MGC (Mcorr)  
Mantel - MGC(Mantel)

# Testing Power Difference for HD Settings

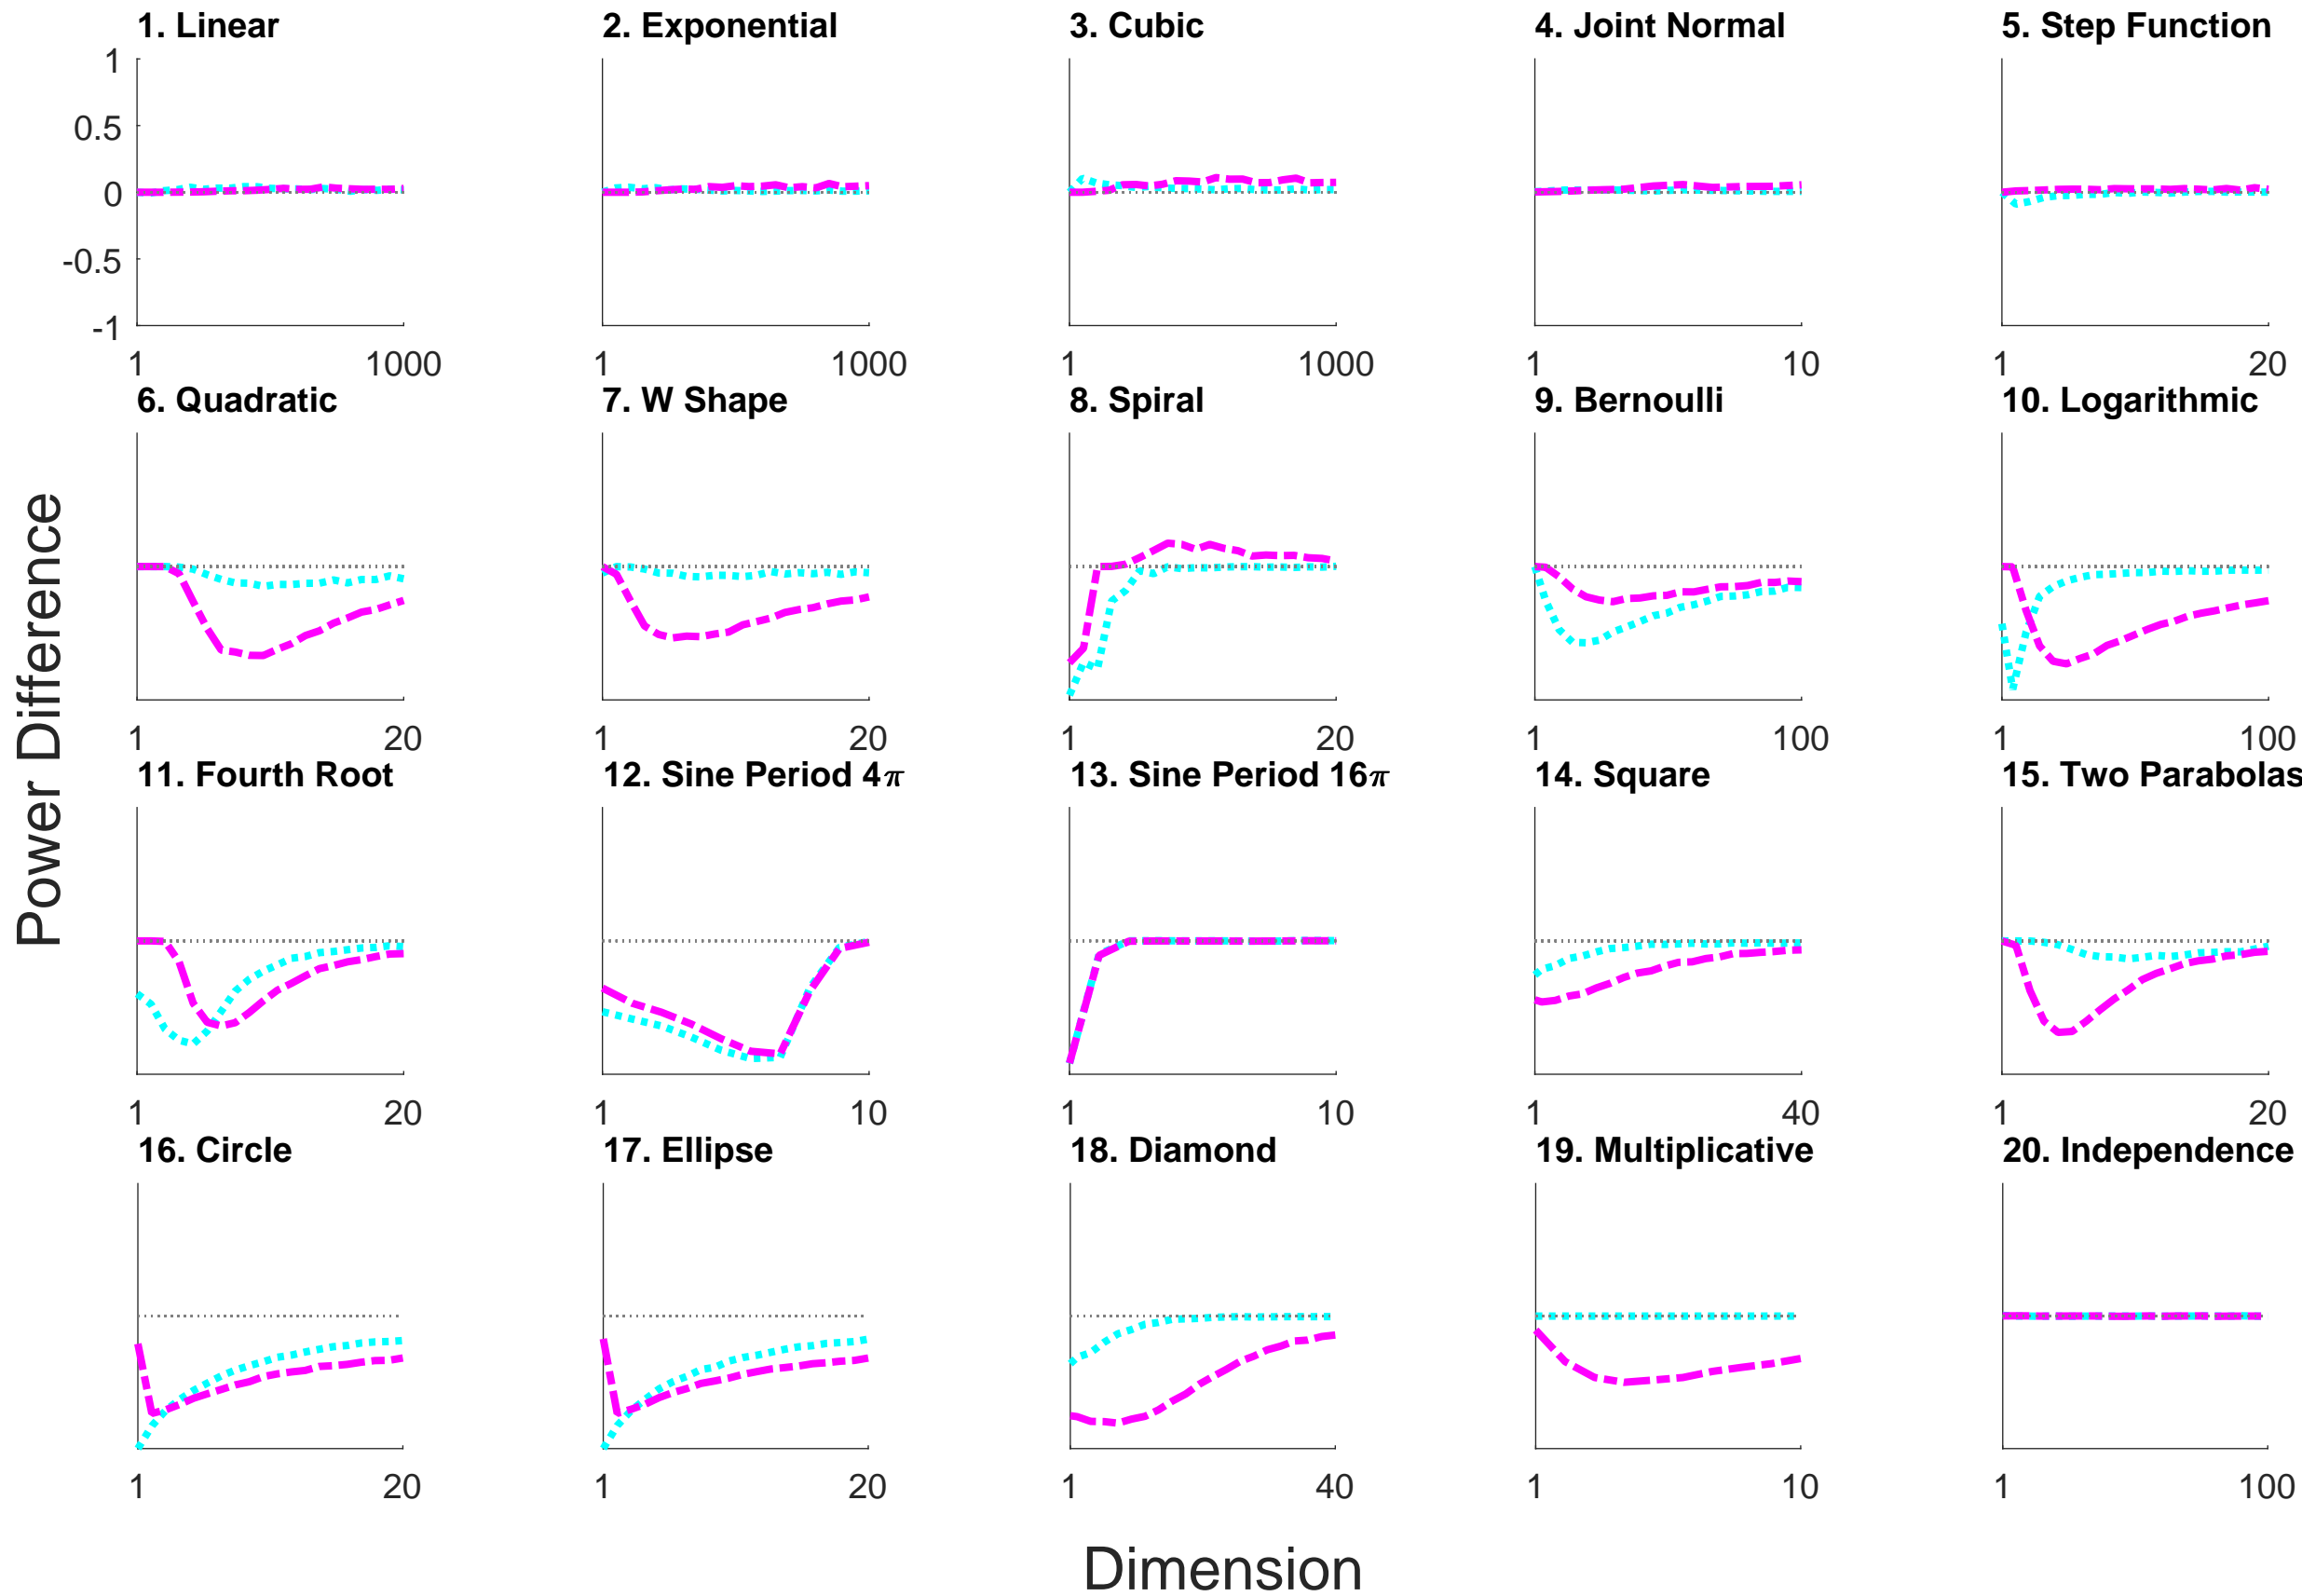

Supplement: supp [file elife-41690-supp-v1.zip]

# Testing Power for 20 Simulated 1-Dimensional Settings

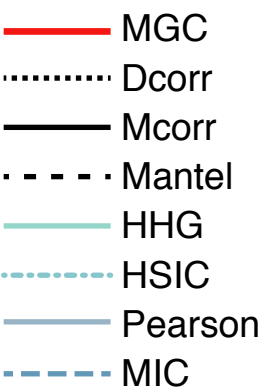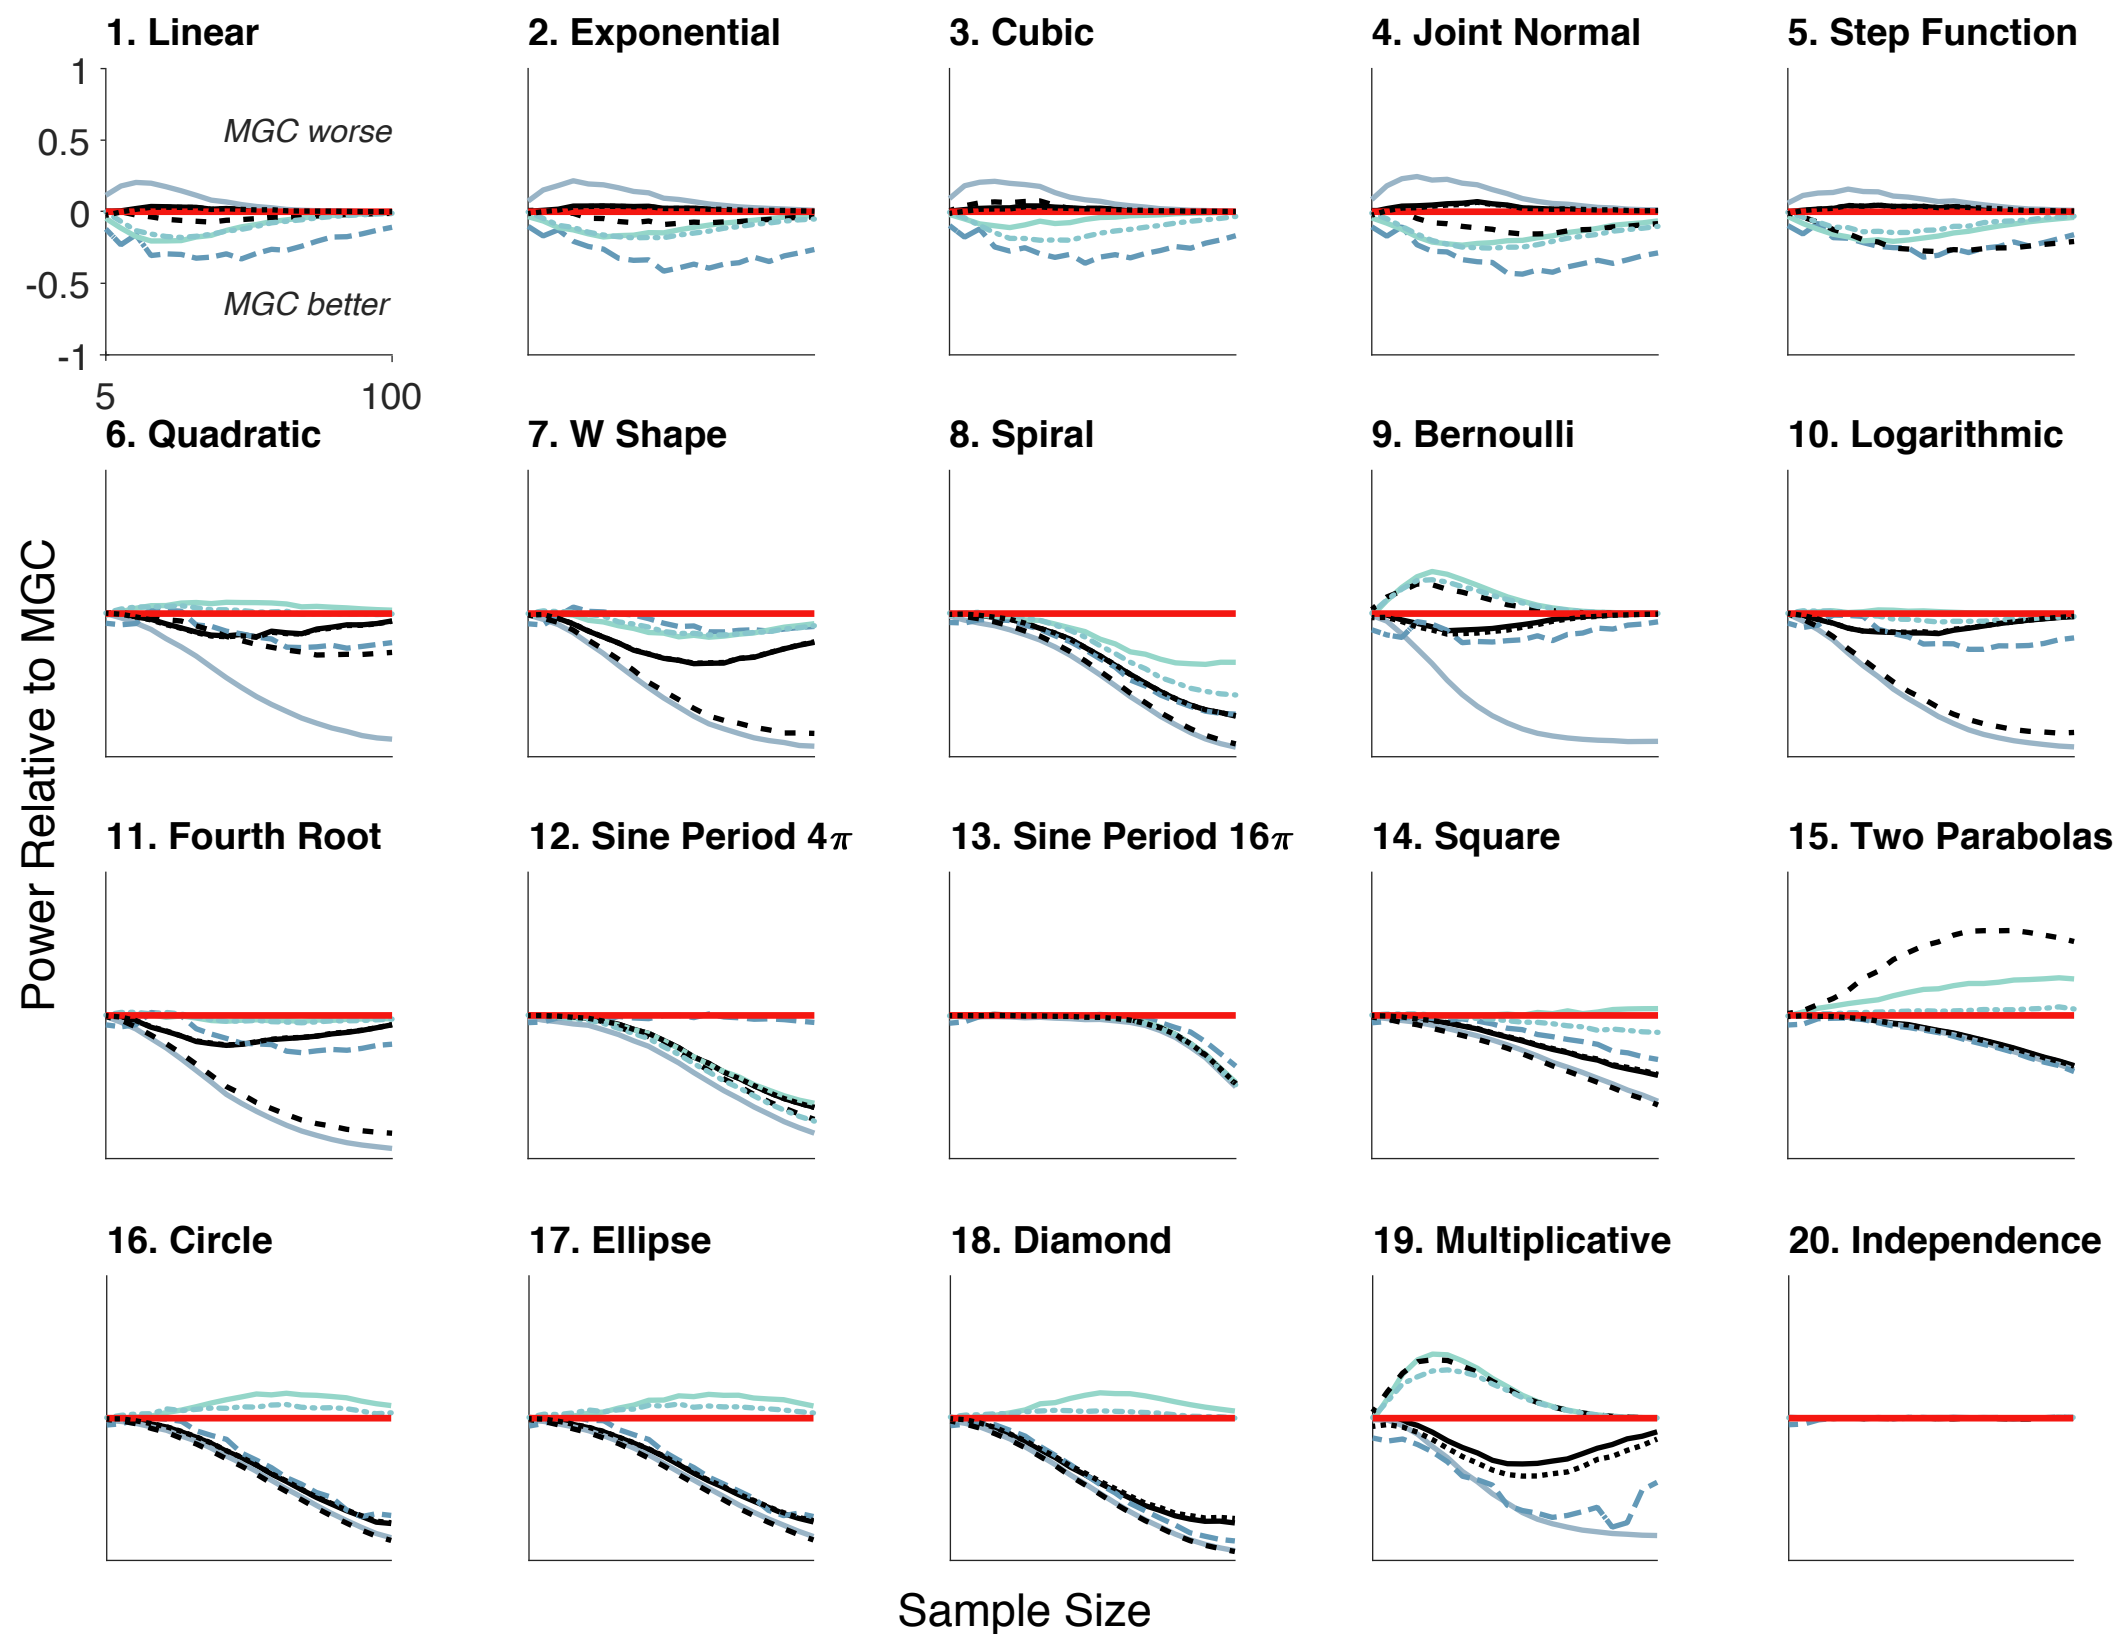

Supplement: supp [file elife-41690-supp-v1.zip]
